# Supplementary material
Source: Royal Society of Chemistry journal article supplement (doi:10.1039/d6tc00496b)
Supplement: d6tc00496b1.xlsx [file d6tc00496b1.xlsx]

## Sheet: Sheet1
Target RS Voltage (V)	Target RS Current Density (mA cm-2)		Target FS Voltage (V)	Target RS Current Density (mA cm-2)		Control RS Voltage (V)	Control RS Current Density (mA cm-2)		Control FS Voltage (V)	Control FS Current Density (mA cm-2)
1.5	-0.00833271		-0.5	0.00073931		1.4	-0.0029749		-0.2	0.00069936
1.4798	-0.00724972		-0.4798	0.00073973		1.38385	-0.00250549		-0.18385	0.00069834
1.4596	-0.00624305		-0.4596	0.00074003		1.3677	-0.00209012		-0.1677	0.00069787
1.4394	-0.00530869		-0.4394	0.00073994		1.3515	-0.00172375		-0.1515	0.00069964
1.4192	-0.00444915		-0.4192	0.00073958		1.33535	-0.00140512		-0.13535	0.00070096
1.399	-0.00366716		-0.399	0.00073918		1.3192	-0.00112458		-0.1192	0.00070202
1.3788	-0.0029615		-0.3788	0.0007383		1.30305	-0.0008993		-0.10305	0.0007041
1.3586	-0.00233281		-0.3586	0.00073807		1.28685	-0.00069646		-0.08685	0.00070542
1.3384	-0.00178064		-0.3384	0.00073734		1.2707	-0.00052416		-0.0707	0.00070655
1.3182	-0.00130095		-0.3182	0.00073575		1.25455	-0.00037624		-0.05455	0.00070762
1.298	-0.0008745		-0.298	0.00073644		1.2384	-0.00024797		-0.0384	0.0007074
1.2778	-0.00052915		-0.2778	0.00073528		1.2222	-0.00013428		-0.0222	0.00070711
1.2576	-0.00024392		-0.2576	0.00073539		1.20605	-3.288e-05		-0.00605	0.00070675
1.23735	-6.8e-06		-0.23735	0.00073589		1.1899	5.896e-05		0.0101	0.00070644
1.21715	0.00017475		-0.21715	0.00073603		1.17375	0.00014248		0.02625	0.00070617
1.19695	0.00031108		-0.19695	0.00073623		1.1576	0.00021938		0.0424	0.00070612
1.17675	0.00041332		-0.17675	0.00073553		1.1414	0.0002906		0.0586	0.00070548
1.15655	0.00048919		-0.15655	0.00073551		1.12525	0.00035551		0.07475	0.00070549
1.13635	0.00054524		-0.13635	0.00073505		1.1091	0.0004128		0.0909	0.00070571
1.11615	0.00058621		-0.11615	0.00073437		1.09295	0.00046151		0.10705	0.00070525
1.09595	0.00061625		-0.09595	0.00073358		1.07675	0.00050144		0.12325	0.00070525
1.07575	0.00063907		-0.07575	0.00073345		1.0606	0.0005341		0.1394	0.00070497
1.05555	0.00065652		-0.05555	0.0007334		1.04445	0.00056055		0.15555	0.0007051
1.03535	0.00067075		-0.03535	0.00073319		1.0283	0.00058236		0.1717	0.00070421
1.01515	0.00068145		-0.01515	0.00073377		1.0121	0.00060092		0.1879	0.00070342
0.99495	0.00069087		0.00505	0.00073368		0.99595	0.00061647		0.20405	0.000703
0.97475	0.00069806		0.02525	0.00073399		0.9798	0.00062954		0.2202	0.00070219
0.95455	0.00070349		0.04545	0.00073353		0.96365	0.00064062		0.23635	0.0007022
0.93435	0.00070933		0.06565	0.00073345		0.94745	0.00065004		0.25255	0.00070231
0.91415	0.00071296		0.08585	0.00073369		0.9313	0.00065813		0.2687	0.00070241
0.89395	0.00071706		0.10605	0.00073314		0.91515	0.00066496		0.28485	0.00070141
0.87375	0.00071965		0.12625	0.00073241		0.899	0.00067064		0.301	0.00070035
0.85355	0.00072175		0.14645	0.00073155		0.88285	0.00067463		0.31715	0.00070003
0.83335	0.00072362		0.16665	0.00073131		0.86665	0.0006781		0.33335	0.00069967
0.81315	0.00072421		0.18685	0.00073122		0.8505	0.00068095		0.3495	0.00069882
0.79295	0.00072452		0.20705	0.00073106		0.83435	0.00068197		0.36565	0.00069851
0.77275	0.00072463		0.22725	0.00073102		0.8182	0.00068284		0.3818	0.0006983
0.75255	0.00072651		0.24745	0.00073126		0.802	0.00068365		0.398	0.0006982
0.7323	0.00072764		0.2677	0.00073063		0.78585	0.00068493		0.41415	0.00069684
0.7121	0.00072885		0.2879	0.00073004		0.7697	0.00068667		0.4303	0.00069589
0.6919	0.00073025		0.3081	0.00072942		0.75355	0.00068759		0.44645	0.00069574
0.6717	0.00073101		0.3283	0.00072908		0.73735	0.00068861		0.46265	0.00069516
0.6515	0.00073196		0.3485	0.0007281		0.7212	0.0006897		0.4788	0.00069441
0.6313	0.00073321		0.3687	0.00072724		0.70505	0.00069006		0.49495	0.00069378
0.6111	0.00073364		0.3889	0.00072691		0.6889	0.00068997		0.5111	0.00069333
0.5909	0.00073402		0.4091	0.00072529		0.67275	0.00068994		0.52725	0.00069286
0.5707	0.00073385		0.4293	0.00072428		0.65655	0.0006904		0.54345	0.00069306
0.5505	0.00073432		0.4495	0.00072433		0.6404	0.00069169		0.5596	0.00069212
0.5303	0.00073379		0.4697	0.00072381		0.62425	0.00069177		0.57575	0.0006911
0.5101	0.00073393		0.4899	0.00072463		0.6081	0.00069252		0.5919	0.00069047
0.4899	0.00073441		0.5101	0.0007244		0.5919	0.00069318		0.6081	0.00068946
0.4697	0.0007351		0.5303	0.00072364		0.57575	0.00069338		0.62425	0.00068825
0.4495	0.00073655		0.5505	0.00072341		0.5596	0.00069475		0.6404	0.00068682
0.4293	0.00073743		0.5707	0.00072311		0.54345	0.00069561		0.65655	0.00068597
0.4091	0.00073757		0.5909	0.00072181		0.52725	0.00069619		0.67275	0.00068497
0.3889	0.00073752		0.6111	0.00072152		0.5111	0.00069658		0.6889	0.00068388
0.3687	0.00073746		0.6313	0.00072106		0.49495	0.00069728		0.70505	0.00068163
0.3485	0.00073677		0.6515	0.00072027		0.4788	0.0006975		0.7212	0.00068073
0.3283	0.00073678		0.6717	0.00071929		0.46265	0.00069766		0.73735	0.00067932
0.3081	0.00073649		0.6919	0.00071823		0.44645	0.00069715		0.75355	0.00067778
0.2879	0.00073643		0.7121	0.00071752		0.4303	0.0006978		0.7697	0.0006758
0.2677	0.00073775		0.7323	0.00071733		0.41415	0.00069835		0.78585	0.00067305
0.24745	0.00073856		0.75255	0.00071643		0.398	0.00069887		0.802	0.00066902
0.22725	0.00073931		0.77275	0.0007155		0.3818	0.00069882		0.8182	0.00066377
0.20705	0.0007405		0.79295	0.00071476		0.36565	0.00069916		0.83435	0.00065859
0.18685	0.00074092		0.81315	0.00071354		0.3495	0.00069908		0.8505	0.0006518
0.16665	0.00074161		0.83335	0.00071172		0.33335	0.00069933		0.86665	0.00064352
0.14645	0.00074159		0.85355	0.00070921		0.31715	0.0006997		0.88285	0.00063344
0.12625	0.00074174		0.87375	0.00070741		0.301	0.00070037		0.899	0.00062164
0.10605	0.00074151		0.89395	0.00070498		0.28485	0.00070014		0.91515	0.00060665
0.08585	0.00074083		0.91415	0.00070211		0.2687	0.00070026		0.9313	0.00059012
0.06565	0.00074135		0.93435	0.00069931		0.25255	0.00070155		0.94745	0.00057063
0.04545	0.00074174		0.95455	0.00069472		0.23635	0.00070208		0.96365	0.00054984
0.02525	0.00074173		0.97475	0.00068893		0.2202	0.00070256		0.9798	0.0005274
0.00505	0.00074267		0.99495	0.00068105		0.20405	0.00070302		0.99595	0.00050342
-0.01515	0.00074361		1.01515	0.0006717		0.1879	0.00070341		1.0121	0.00047722
-0.03535	0.00074402		1.03535	0.00065934		0.1717	0.00070353		1.0283	0.00044833
-0.05555	0.0007444		1.05555	0.00064281		0.15555	0.0007029		1.04445	0.00041658
-0.07575	0.00074477		1.07575	0.00062222		0.1394	0.00070208		1.0606	0.00038069
-0.09595	0.00074552		1.09595	0.00059607		0.12325	0.00070182		1.07675	0.00033984
-0.11615	0.00074562		1.11615	0.00056012		0.10705	0.00070275		1.09295	0.00029454
-0.13635	0.00074578		1.13635	0.00051367		0.0909	0.00070432		1.1091	0.00024553
-0.15655	0.00074537		1.15655	0.00045013		0.07475	0.00070575		1.12525	0.00019383
-0.17675	0.00074497		1.17675	0.00036481		0.0586	0.00070647		1.1414	0.00013862
-0.19695	0.00074532		1.19695	0.00025068		0.0424	0.00070721		1.1576	7.814e-05
-0.21715	0.00074524		1.21715	9.769e-05		0.02625	0.0007074		1.17375	1.392e-05
-0.23735	0.00074548		1.23735	-9.98e-05		0.0101	0.000708		1.1899	-5.6e-05
-0.2576	0.00074611		1.2576	-0.00035801		-0.00605	0.00070766		1.20605	-0.00013911
-0.2778	0.00074692		1.2778	-0.00067308		-0.0222	0.00070806		1.2222	-0.00022628
-0.298	0.00074709		1.298	-0.00106726		-0.0384	0.00070803		1.2384	-0.0003264
-0.3182	0.00074757		1.3182	-0.00152845		-0.05455	0.0007075		1.25455	-0.00044233
-0.3384	0.00074666		1.3384	-0.00206554		-0.0707	0.00070714		1.2707	-0.00057689
-0.3586	0.00074665		1.3586	-0.00267937		-0.08685	0.00070705		1.28685	-0.00073328
-0.3788	0.00074697		1.3788	-0.00337457		-0.10305	0.00070682		1.30305	-0.00091702
-0.399	0.00074734		1.399	-0.00415096		-0.1192	0.00070616		1.3192	-0.00110354
-0.4192	0.00074684		1.4192	-0.00501052		-0.13535	0.00070668		1.33535	-0.00136526
-0.4394	0.00074787		1.4394	-0.00594767		-0.1515	0.0007066		1.3515	-0.00166347
-0.4596	0.00074844		1.4596	-0.00696569		-0.1677	0.00070646		1.3677	-0.00201375
-0.4798	0.00074911		1.4798	-0.00806432		-0.18385	0.00070765		1.38385	-0.00242265
-0.5	0.00074973		1.5	-0.00924824		-0.2	0.00070809		1.4	-0.00290168

## Sheet: Sheet2
Wavelenght (nm)	Target EQE (%)	Target JSC (mA cm-2)	Target Integrated JSC (mA cm-2)		Wavelenght (nm)	Control EQE (%)	Control JSC (mA cm-2)	Control Integrated JSC (mA cm-2)
310	7.24511	0.00108	0.00108		310	0.77212	0.00114	0.00114
320	24.7204	0.01549	0.01657		320	17.0198	0.01442	0.01556
330	39.9313	0.05929	0.07586		330	32.9115	0.05445	0.07001
340	52.7475	0.08589	0.16175		340	45.7241	0.07848	0.14849
350	62.8156	0.11079	0.27254		350	56.3093	0.10124	0.24973
360	72.5802	0.14917	0.42171		360	66.8716	0.13687	0.3866
370	80.3107	0.21414	0.63585		370	75.0146	0.19552	0.58212
380	80.584	0.20481	0.84066		380	75.2251	0.18624	0.76836
390	80.4284	0.23859	1.07925		390	75.4988	0.22001	0.98837
400	80.411	0.34201	1.42126		400	75.2795	0.31377	1.30214
410	78.9618	0.32398	1.74524		410	74.4308	0.29837	1.60051
420	77.4279	0.34861	2.09385		420	73.1197	0.32123	1.92174
430	76.6291	0.27505	2.3689		430	72.5204	0.25501	2.17675
440	76.5448	0.43392	2.80282		440	72.432	0.39981	2.57656
450	76.9708	0.51554	3.31836		450	73.1245	0.47509	3.05165
460	77.5138	0.52037	3.83873		460	73.8768	0.47746	3.52911
470	78.0204	0.52766	4.36639		470	74.2793	0.48436	4.01347
480	79.7201	0.59096	4.95735		480	75.705	0.54291	4.55638
490	81.44	0.61791	5.57526		490	77.3787	0.56847	5.12485
500	82.9363	0.61152	6.18678		500	78.8135	0.56491	5.68976
510	84.4303	0.63622	6.823		510	80.1099	0.58426	6.27402
520	85.5743	0.64707	7.47007		520	81.2258	0.59772	6.87174
530	86.4508	0.67546	8.14553		530	81.8933	0.62079	7.49253
540	87.1472	0.66586	8.81139		540	82.3435	0.61225	8.10478
550	87.4581	0.70695	9.51834		550	82.8444	0.65342	8.7582
560	86.5966	0.68222	10.2006		560	82.8064	0.63634	9.39454
570	86.5078	0.69727	10.8978		570	82.2093	0.64991	10.0444
580	85.696	0.71252	11.6104		580	81.9986	0.66903	10.7135
590	83.6362	0.64564	12.256		590	80.6743	0.61326	11.3267
600	81.4749	0.68832	12.9443		600	77.8971	0.66047	11.9872
610	79.455	0.67935	13.6237		610	75.7242	0.6519	12.6391
620	78.1707	0.68178	14.3054		620	73.5766	0.64685	13.286
630	77.5624	0.64937	14.9548		630	71.1187	0.60282	13.8888
640	77.7662	0.68117	15.636		640	70.8675	0.61659	14.5054
650	79.0179	0.66638	16.3024		650	70.8999	0.59272	15.0981
660	80.6344	0.7107	17.0131		660	72.2405	0.62667	15.7248
670	81.2097	0.7372	17.7503		670	73.2287	0.65311	16.3779
680	80.3425	0.72838	18.4786		680	74.1614	0.6634	17.0413
690	77.9333	0.60668	19.0853		690	73.3859	0.57103	17.6123
700	74.36	0.63704	19.7224		700	70.3994	0.62612	18.2384
710	71.3941	0.6374	20.3598		710	68.4699	0.64636	18.8848
720	67.5664	0.45757	20.8173		720	64.5357	0.48073	19.3655
730	63.3695	0.49824	21.3156		730	59.9127	0.52727	19.8928
740	59.17	0.50963	21.8252		740	55.9758	0.54847	20.4413
750	47.865	0.42283	22.248		750	45.4914	0.46632	20.9076
760	35.4342	0.06838	22.3164		760	32.3472	0.07717	20.9847
770	19.7118	0.16816	22.4846		770	16.0733	0.19601	21.1807
780	4.20421	0.03641	22.521		780	-0.83542	0.05311	21.2339
790	-0.34632	-0.00284	22.5181		790	-4.82207	0.00838	21.2422
800	-2.00914	-0.01646	22.5017		800	-6.05525	-0.00578	21.2365
810	-0.67303	-0.00549	22.4962		810	-1.75273	-0.00258	21.2339
820	-0.56846	-0.00383	22.4924		820	-1.43269	-0.00191	21.232
830	-0.69627	-0.00506	22.4873		830	-1.71232	-0.00258	21.2294
840	-1.78317	-0.01452	22.4728		840	-4.25754	-0.00759	21.2218
850	-2.80829	-0.02036	22.4524		850	-6.67822	-0.01074	21.2111
860	-1.88854	-0.01532	22.4371		860	-4.45958	-0.00818	21.2029
870	-0.44929	-0.00361	22.4335		870	-1.05056	-0.00196	21.2009
880	-0.32956	-0.0026	22.4309		880	-0.76382	-0.00143	21.1995
890	-0.32176	-0.00252	22.4284		890	-0.74688	-0.00139	21.1981
900	-0.31755	-0.00203	22.4263		900	-0.73659	-0.00112	21.197

## Sheet: Sheet3
Days	Target PCE (%)	Control PCE (%)	Target Normalized PCE (%)	Control Normalized PCE (%)
1	21.0202	19.6472	1	1
2	20.673	19.117	0.983	0.973
3	20.6818	19.0878	0.984	0.972
4	20.5131	18.1489	0.976	0.924
6	20.1883	17.6768	0.96	0.9
8	19.9825	16.5622	0.951	0.843
11	19.5028	13.9028	0.928	0.708
16	17.9088		0.852
